# Supplementary material for: Temporal and spatial variability of ice cover occurrence on Carpathian rivers: a regional perspective
Source: Copernicus journal article supplement (doi:10.5194/hess-29-3019-2025), 2025-07-16

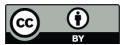

*Supplement of*

## **Temporal and spatial variability of ice cover occurrence on Carpathian rivers: a regional perspective**

**Maksymilian Fuks and Łukasz Wiejaczka**

*Correspondence to:* Maksymilian Fuks ([fuksmaksymilian@twarda.pan.pl](mailto:fuksmaksymilian@twarda.pan.pl))

The copyright of individual parts of the supplement might differ from the article licence.

The document includes:

- classification of water gauges taking into account their division into those that are significantly influenced by human activity and those that remain largely independent of it: **Tab. S1.**,
- a table showing trends in the first and last days with ice cover in the period 1950–2020 (IC): **Tab. S2.**,
- MARTA charts showing the moving averages and trends in the average days of the first and last days with ice cover (IC): **Fig. S1.**,
- MARTA charts for the time series of the number of days with border ice (BI), total ice cover (TIC) and the sum of these phenomena (IC), made using data from each water gauge cross-section (P1–P25).

**Tab. S1.** Classification of water gauges taking into account their division into those that are significantly influenced by human activity and those that remain largely independent of it.

| Group of water gauges                           | Water gauge codes                                                   |
|-------------------------------------------------|---------------------------------------------------------------------|
| Without the strong influence of human activity  | P3, P4, P5, P7, P8, P9, P11, P14, P15, P16, P17, P18, P21, P23, P24 |
| Influenced by the operation of reservoirs       | P1, P12, P13, P19                                                   |
| Other water gauges influenced by human activity | P2, P22, P25                                                        |

**Tab. S2.** Trends in dates of ice cover formation and disappearance at individual stations over the period 1950–2020.

| Station code | Trend in date of first day with ice cover [days/decade]. |             | Trend in the date of the last day with ice cover [days/decade]. |             |
|--------------|----------------------------------------------------------|-------------|-----------------------------------------------------------------|-------------|
|              | Sen slope                                                | Linear reg. | Sen slope                                                       | Linear reg. |
| P1           | 1.8                                                      | 2.6         | -2.2                                                            |             |
| P2           | -1.6                                                     |             | -0.2                                                            |             |
| P3           | -0.3                                                     |             | -0.8                                                            |             |
| P4           | -1.3                                                     | -1.6        | -0.9                                                            |             |
| P5           | 1.5                                                      |             | 0                                                               |             |
| P6           | 0.6                                                      |             | -0.7                                                            |             |
| P7           | <b>-2.5</b>                                              | -2.4        | -0.8                                                            |             |
| P8           | 1.5                                                      | 1.3         | <b>-2.7</b>                                                     |             |
| P9           | -0.5                                                     | -1          | 0.5                                                             |             |
| P10          | -0.5                                                     |             | -2                                                              |             |
| P11          | -1                                                       | -1.3        | -0.8                                                            |             |
| P12          | 2.2                                                      | 1.5         | <b>-3.3</b>                                                     | <b>-3.7</b> |
| P13          | <b>3</b>                                                 |             | <b>-3</b>                                                       |             |
| P14          | 0.5                                                      |             | <b>-2.2</b>                                                     |             |
| P15          | 0.9                                                      | 0.6         | -1.3                                                            |             |
| P16          | -1.1                                                     |             | 0.3                                                             |             |
| P17          | 0                                                        | -0.7        | -2.5                                                            |             |
| P18          | -1.4                                                     | -1.7        | 0.7                                                             |             |
| P19          | 1.4                                                      | 1.1         | -2                                                              |             |
| P20          | 2.2                                                      | 1.6         | -2                                                              |             |
| P21          | -1.8                                                     | <b>-2.5</b> | -0.4                                                            |             |
| P22          | 0                                                        | -0.4        | 0.3                                                             | 0.2         |
| P23          | 1.8                                                      |             | -1.5                                                            |             |
| P24          | -0.4                                                     |             | -0.6                                                            |             |

|      |      |       |             |       |
|------|------|-------|-------------|-------|
| P25  | 2.1  | 1.7   | <b>-3.8</b> |       |
| Mean | 0.28 | -0.08 | -1.28       | -1.75 |

The trends determined using the Theil-Sen estimator (Sen.) and the linear regression equation (Lin.) are presented. The results for linear regression were included only if the regression residuals had a normal distribution. Statistically significant trends at the  $p<0.05$  level are indicated in bold, based on the Mann-Kendall test for the Theil-Sen estimator and the Student's t-test for linear regression.

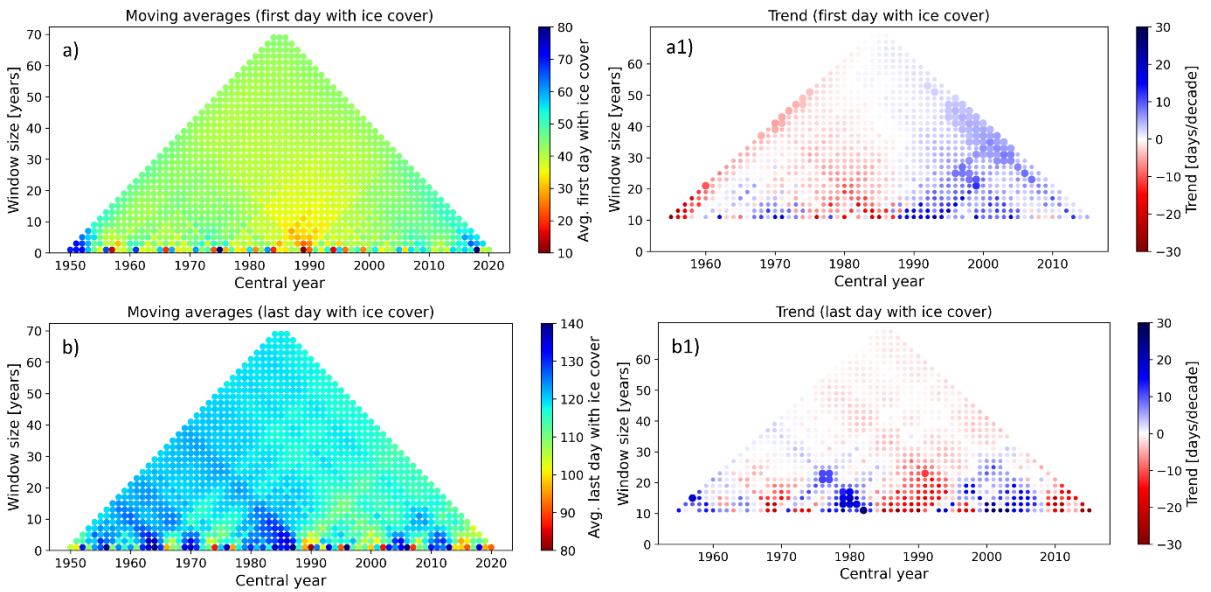

**Fig. S1.** MARTA graphs showing moving average (a and b) and trend (a1 and b1) in average annual dates of appearance (a and a1) and disappearance (b and b1) of ice cover (average values from all P1–P25 stations). In the a1 and b1 graphs, statistically significant values at the  $p<0.05$  level are marked with larger markers.

## MARTA charts for ice cover (sum of border ice and total ice cover):

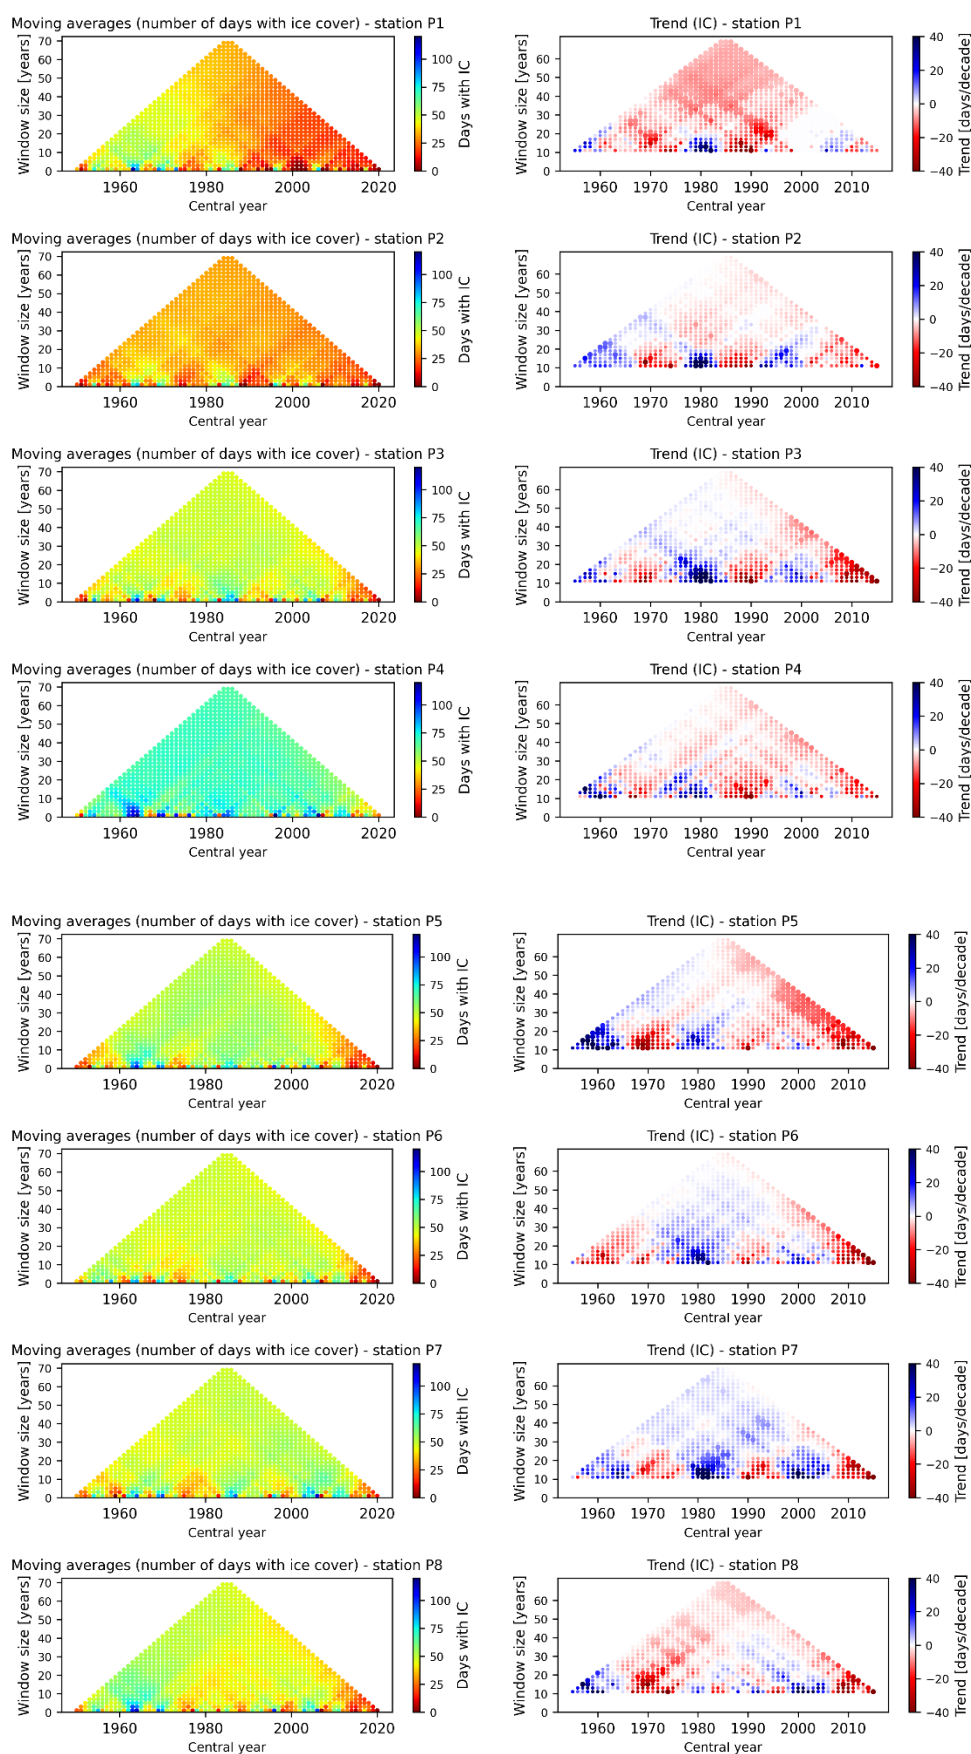

Moving averages (number of days with ice cover) - station P9

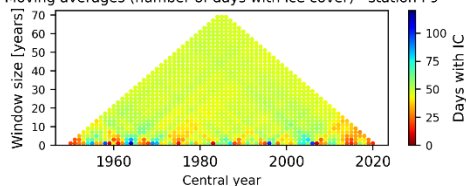

Trend (IC) - station P9

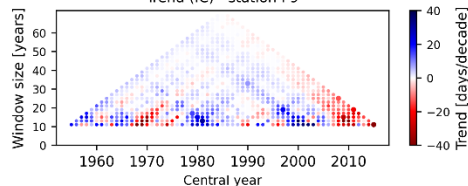

Moving averages (number of days with ice cover) - station P10

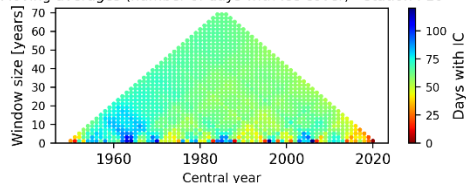

Trend (IC) - station P10

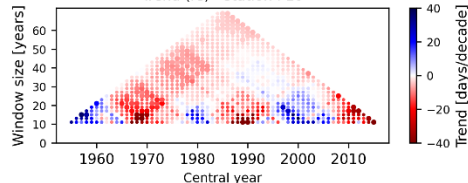

Moving averages (number of days with ice cover) - station P11

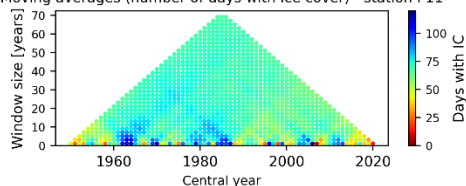

Trend (IC) - station P11

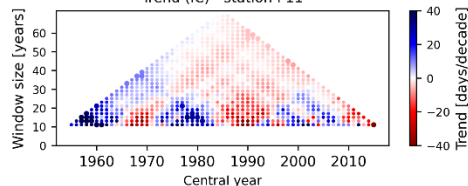

Moving averages (number of days with ice cover) - station P12

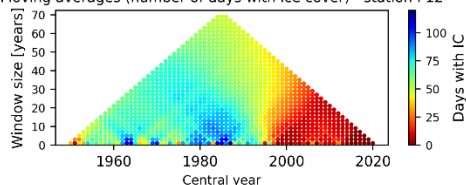

Trend (IC) - station P12

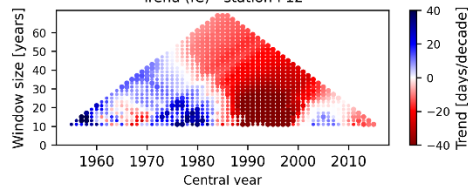

Moving averages (number of days with ice cover) - station P13

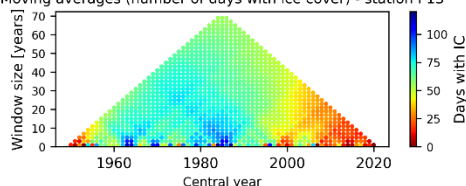

Trend (IC) - station P13

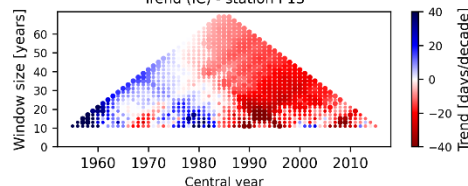

Moving averages (number of days with ice cover) - station P14

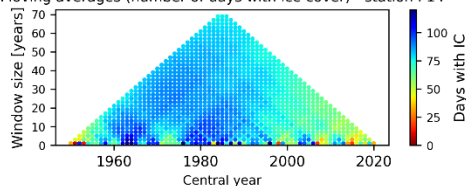

Trend (IC) - station P14

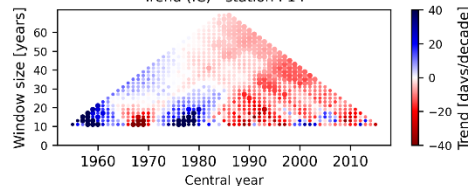

Moving averages (number of days with ice cover) - station P15

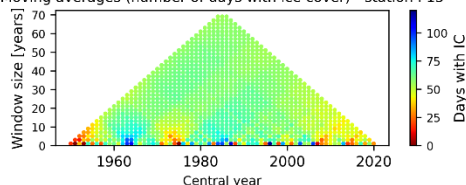

Trend (IC) - station P15

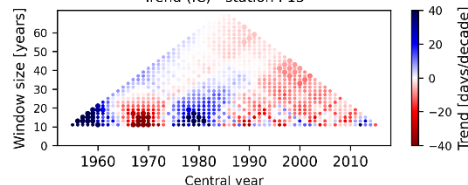

Moving averages (number of days with ice cover) - station P16

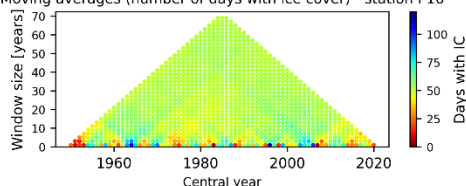

Trend (IC) - station P16

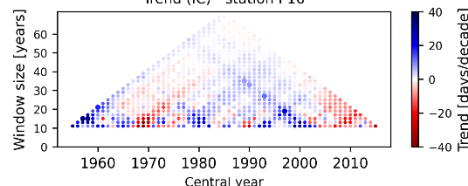





Moving averages (number of days with ice cover) - station P25

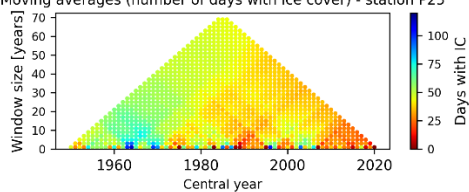

Trend (IC) - station P25

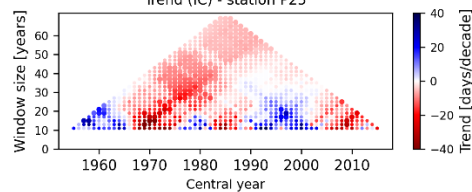

## MARTA charts for border ice:

Running average (number of days with border ice) - station P1

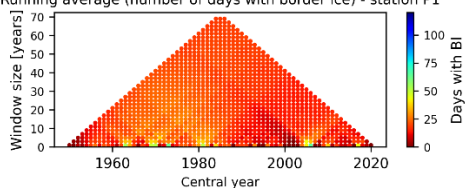

Trend (BI) - station P1

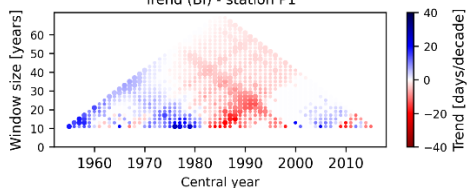

Running average (number of days with border ice) - station P2

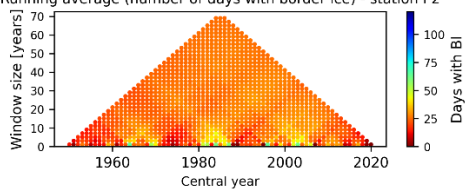

Trend (BI) - station P2

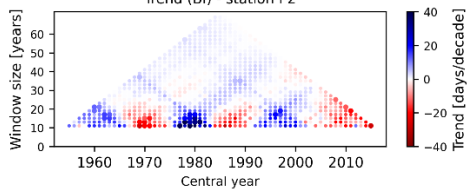

Running average (number of days with border ice) - station P3

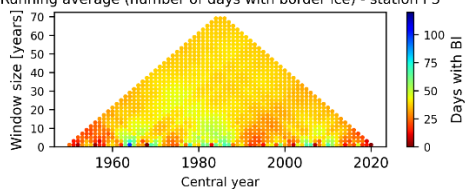

Trend (BI) - station P3

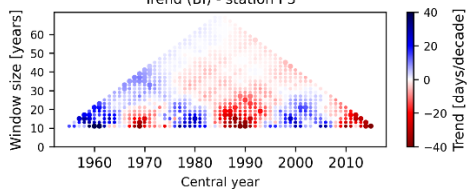

Running average (number of days with border ice) - station P4

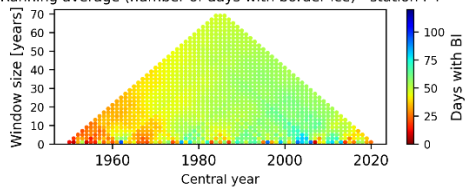

Trend (BI) - station P4

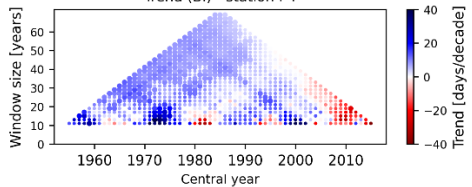

Running average (number of days with border ice) - station P5

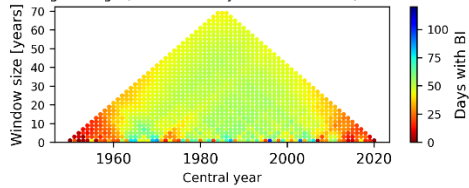

Trend (BI) - station P5

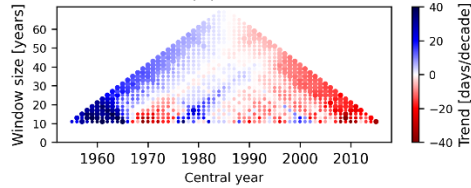

Running average (number of days with border ice) - station P6

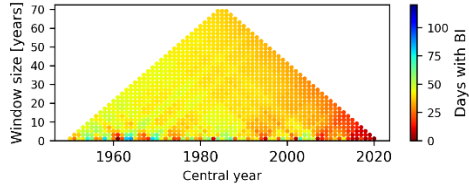

Trend (BI) - station P6

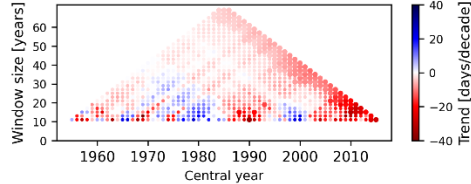

Running average (number of days with border ice) - station P7

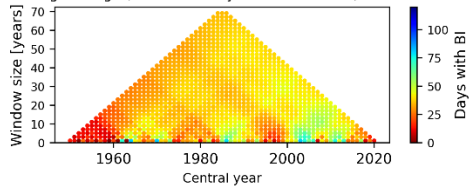

Trend (BI) - station P7

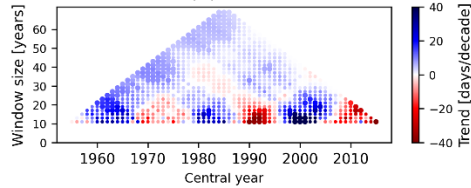

Running average (number of days with border ice) - station P8

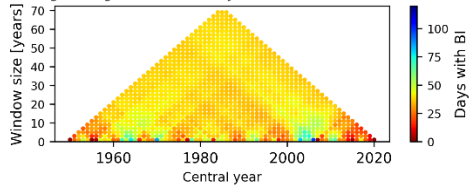

Trend (BI) - station P8

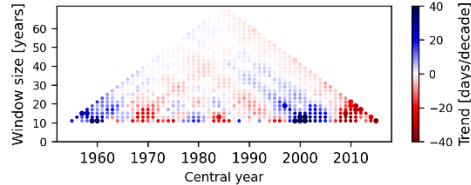

Running average (number of days with border ice) - station P9

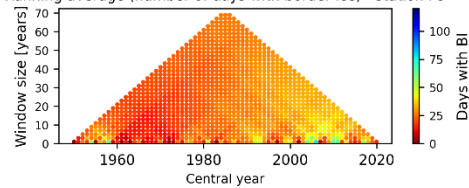

Trend (BI) - station P9

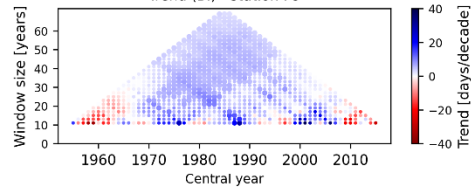

Running average (number of days with border ice) - station P10

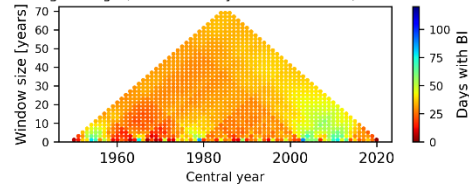

Trend (BI) - station P10

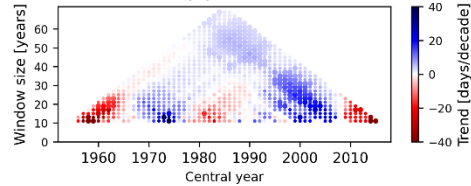

Running average (number of days with border ice) - station P11

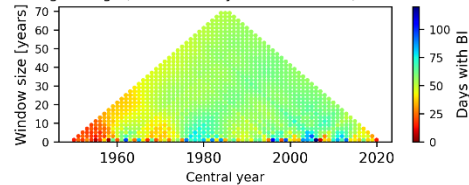

Trend (BI) - station P11

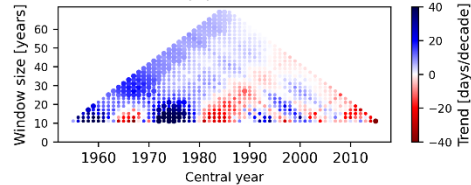

Running average (number of days with border ice) - station P12

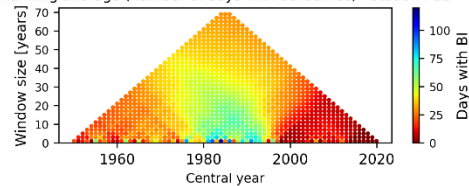

Trend (BI) - station P12

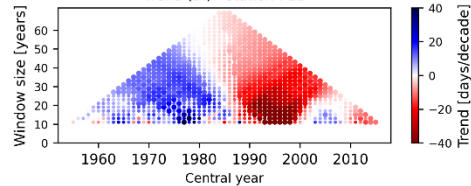





Running average (number of days with border ice) - station P21

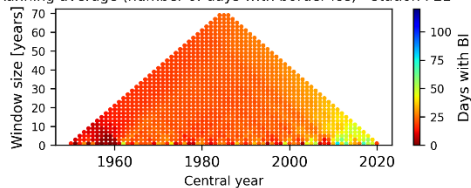

Trend (BI) - station P21

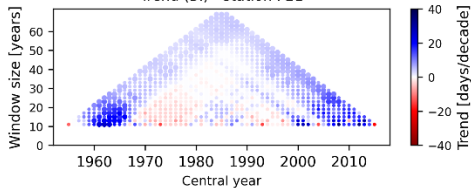

Running average (number of days with border ice) - station P22

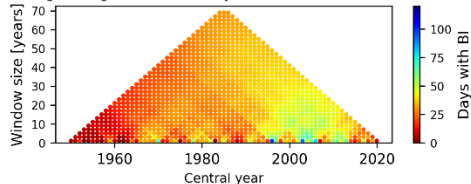

Trend (BI) - station P22

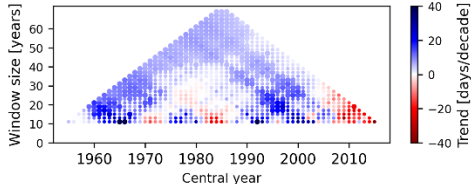

Running average (number of days with border ice) - station P23

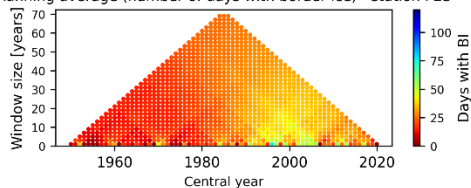

Trend (BI) - station P23

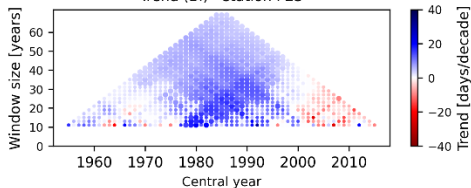

Running average (number of days with border ice) - station P24

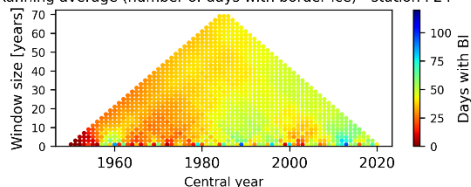

Trend (BI) - station P24

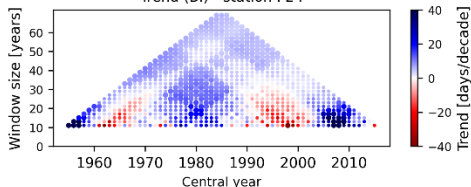

Running average (number of days with border ice) - station P25

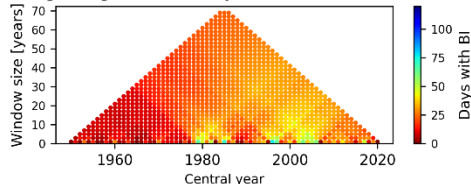

Trend (BI) - station P25

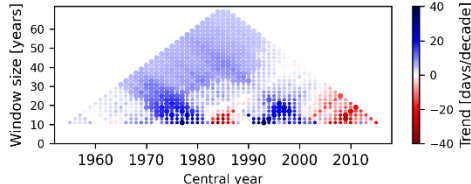

**MARTA charts for total ice cover:**

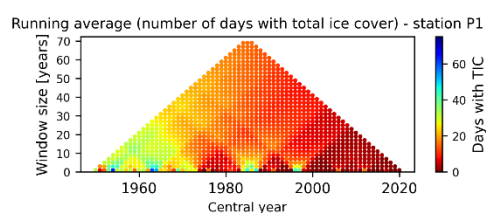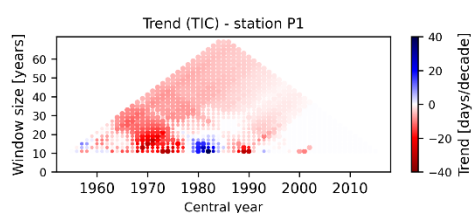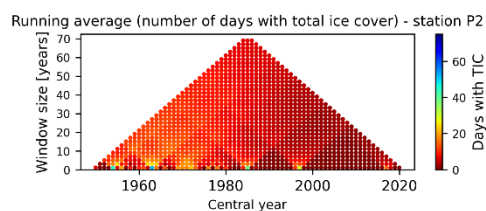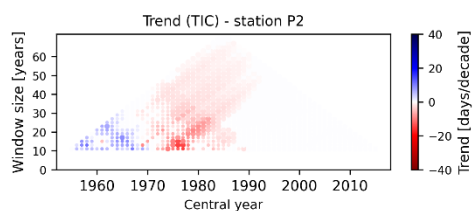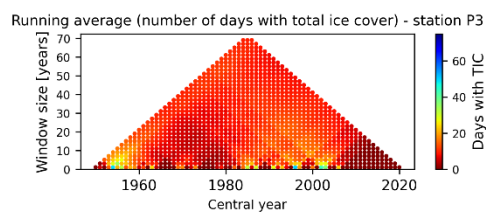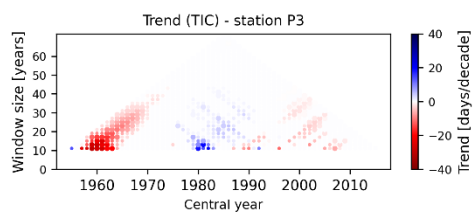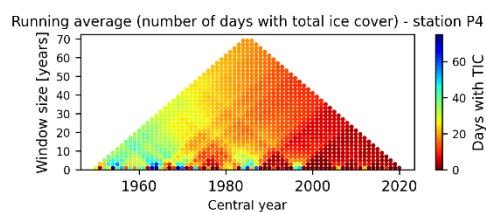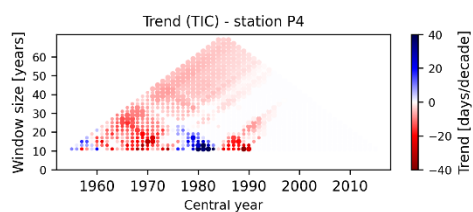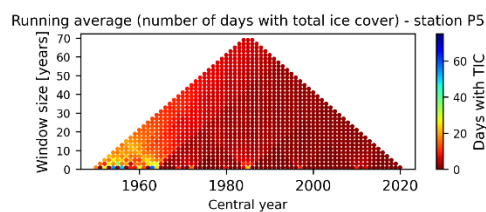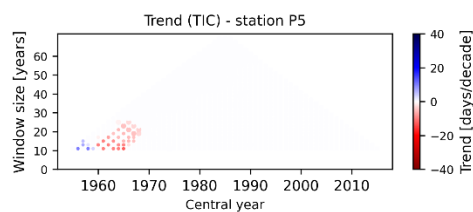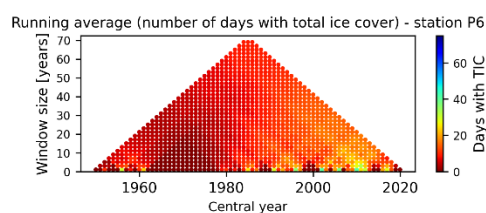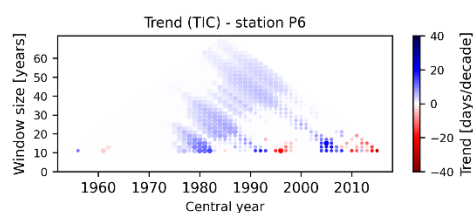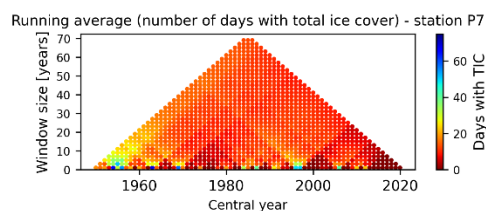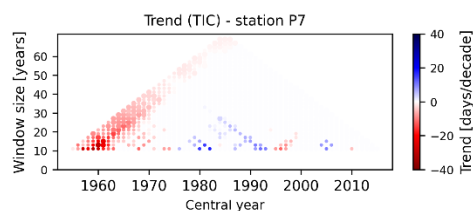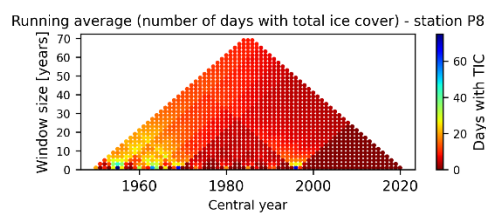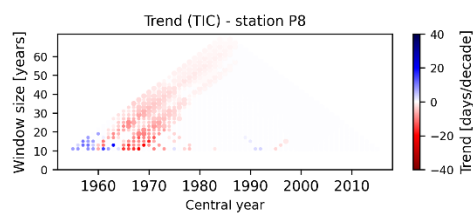

Running average (number of days with total ice cover) - station P9

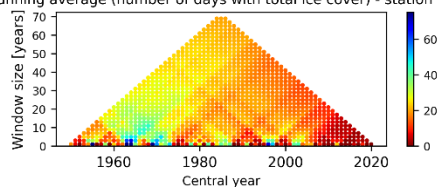

Trend (TIC) - station P9

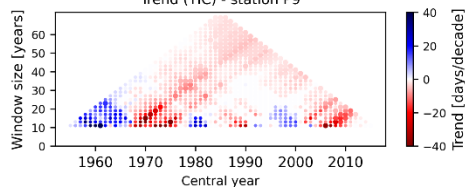

Running average (number of days with total ice cover) - station P10

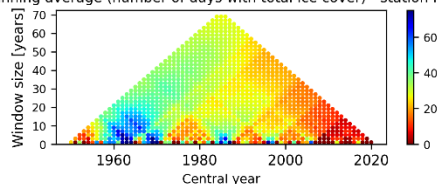

Trend (TIC) - station P10

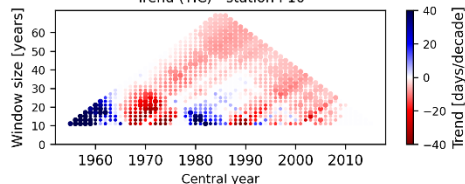

Running average (number of days with total ice cover) - station P11

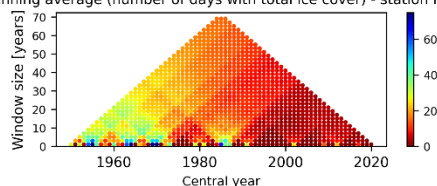

Trend (TIC) - station P11

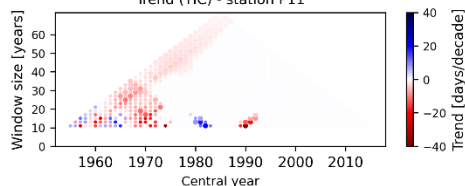

Running average (number of days with total ice cover) - station P12

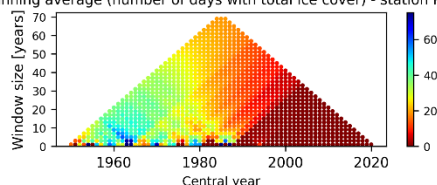

Trend (TIC) - station P12

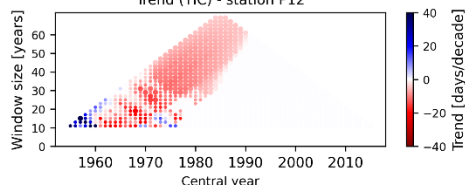

Running average (number of days with total ice cover) - station P13

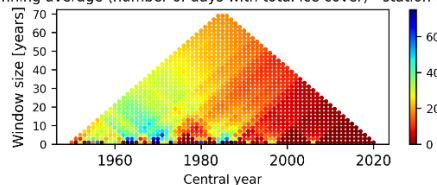

Trend (TIC) - station P13

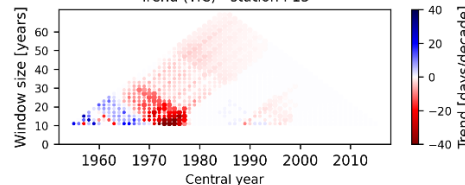

Running average (number of days with total ice cover) - station P14

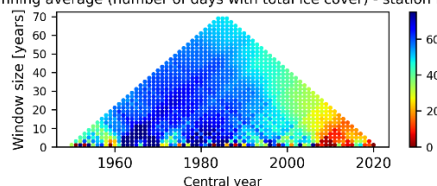

Trend (TIC) - station P14

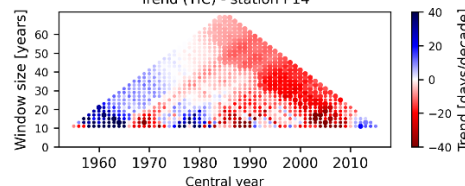

Running average (number of days with total ice cover) - station P15

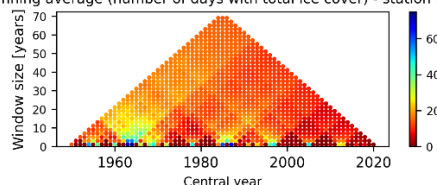

Trend (TIC) - station P15

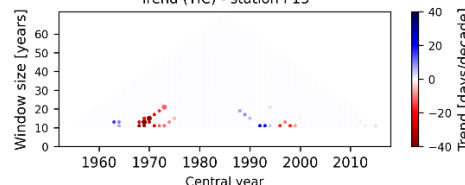

Running average (number of days with total ice cover) - station P16

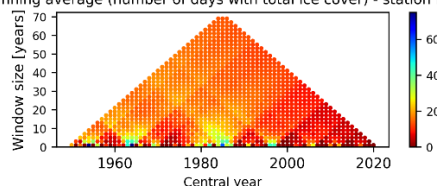

Trend (TIC) - station P16

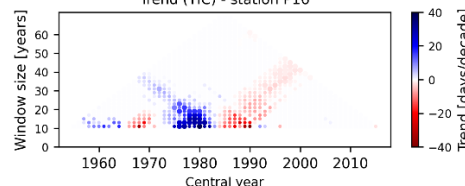



Running average (number of days with total ice cover) - station P17

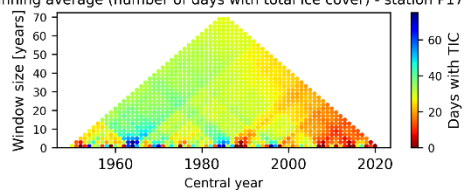

Trend (TIC) - station P17

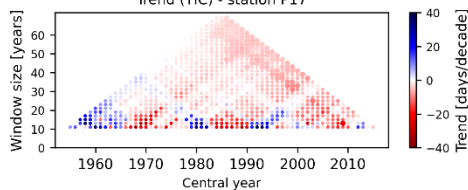

Running average (number of days with total ice cover) - station P18

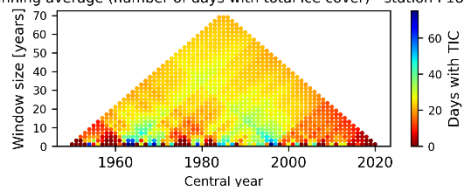

Trend (TIC) - station P18

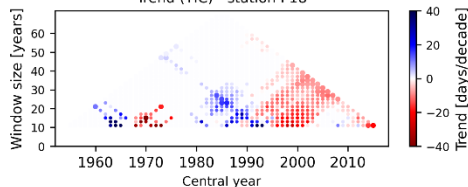

Running average (number of days with total ice cover) - station P19

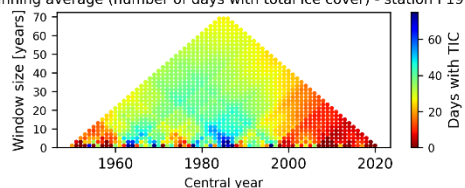

Trend (TIC) - station P19

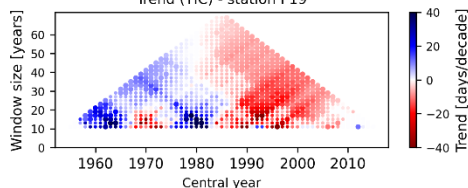

Running average (number of days with total ice cover) - station P20

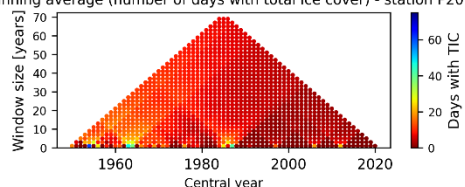

Trend (TIC) - station P20

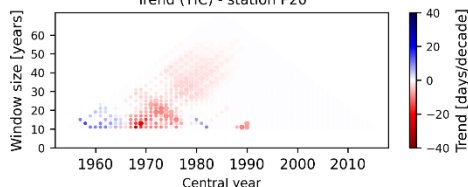

Running average (number of days with total ice cover) - station P21

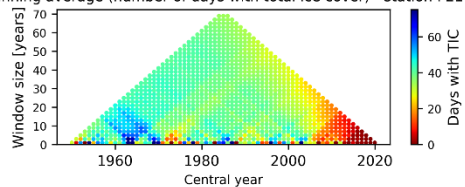

Trend (TIC) - station P21

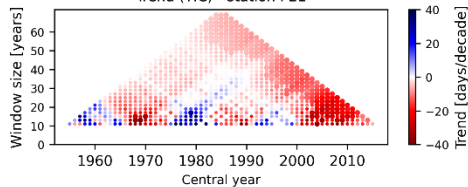

Running average (number of days with total ice cover) - station P22

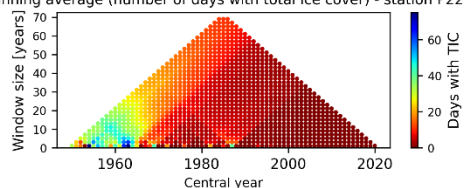

Trend (TIC) - station P22

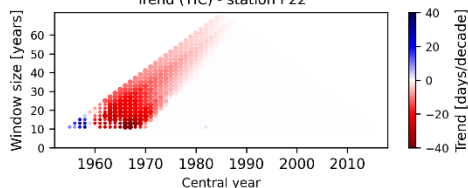

Running average (number of days with total ice cover) - station P23

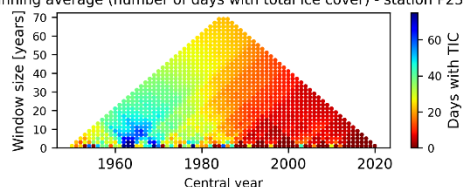

Trend (TIC) - station P23

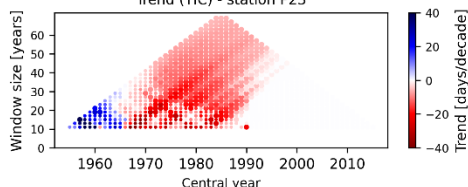

Running average (number of days with total ice cover) - station P24

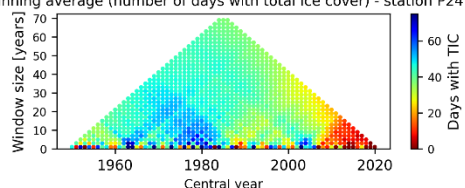

Trend (TIC) - station P24

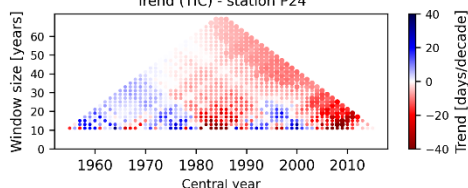



Running average (number of days with total ice cover) - station P25

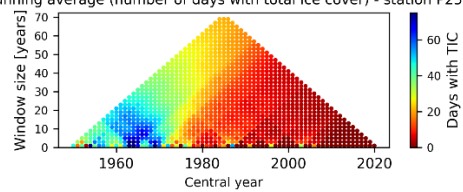

Trend (TIC) - station P25

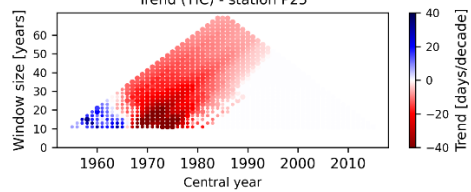

Supplement: Supplementary file 1 [file hess-29-3019-2025-supplement.pdf]
